# Supplementary material
Source: HighWire-hosted journal article supplement (https://mh.bmj.com/content/49/3/436)

**Supplementary Figure 1.**

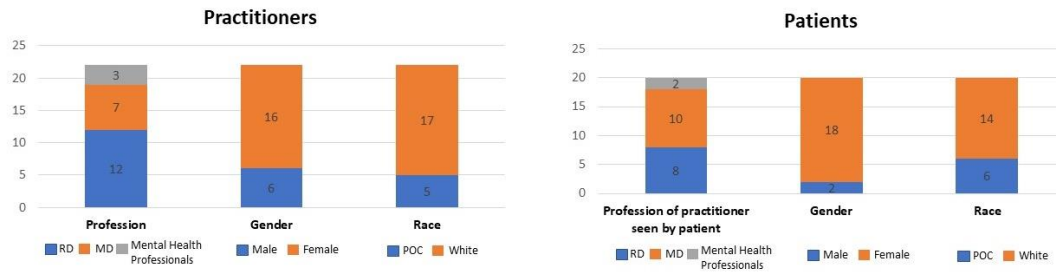

Supplement: inline-supplementary-material-1 [file inline-supplementary-material-1.pdf]
